# Supplementary material for: Plant microbiomes harbor potential to promote nutrient turnover in impoverished substrates of a Brazilian biodiversity hotspot
Source: PubMed Central journal article supplement (PMC9938248; doi:10.1038/s41396-022-01345-1), 2022-12-20

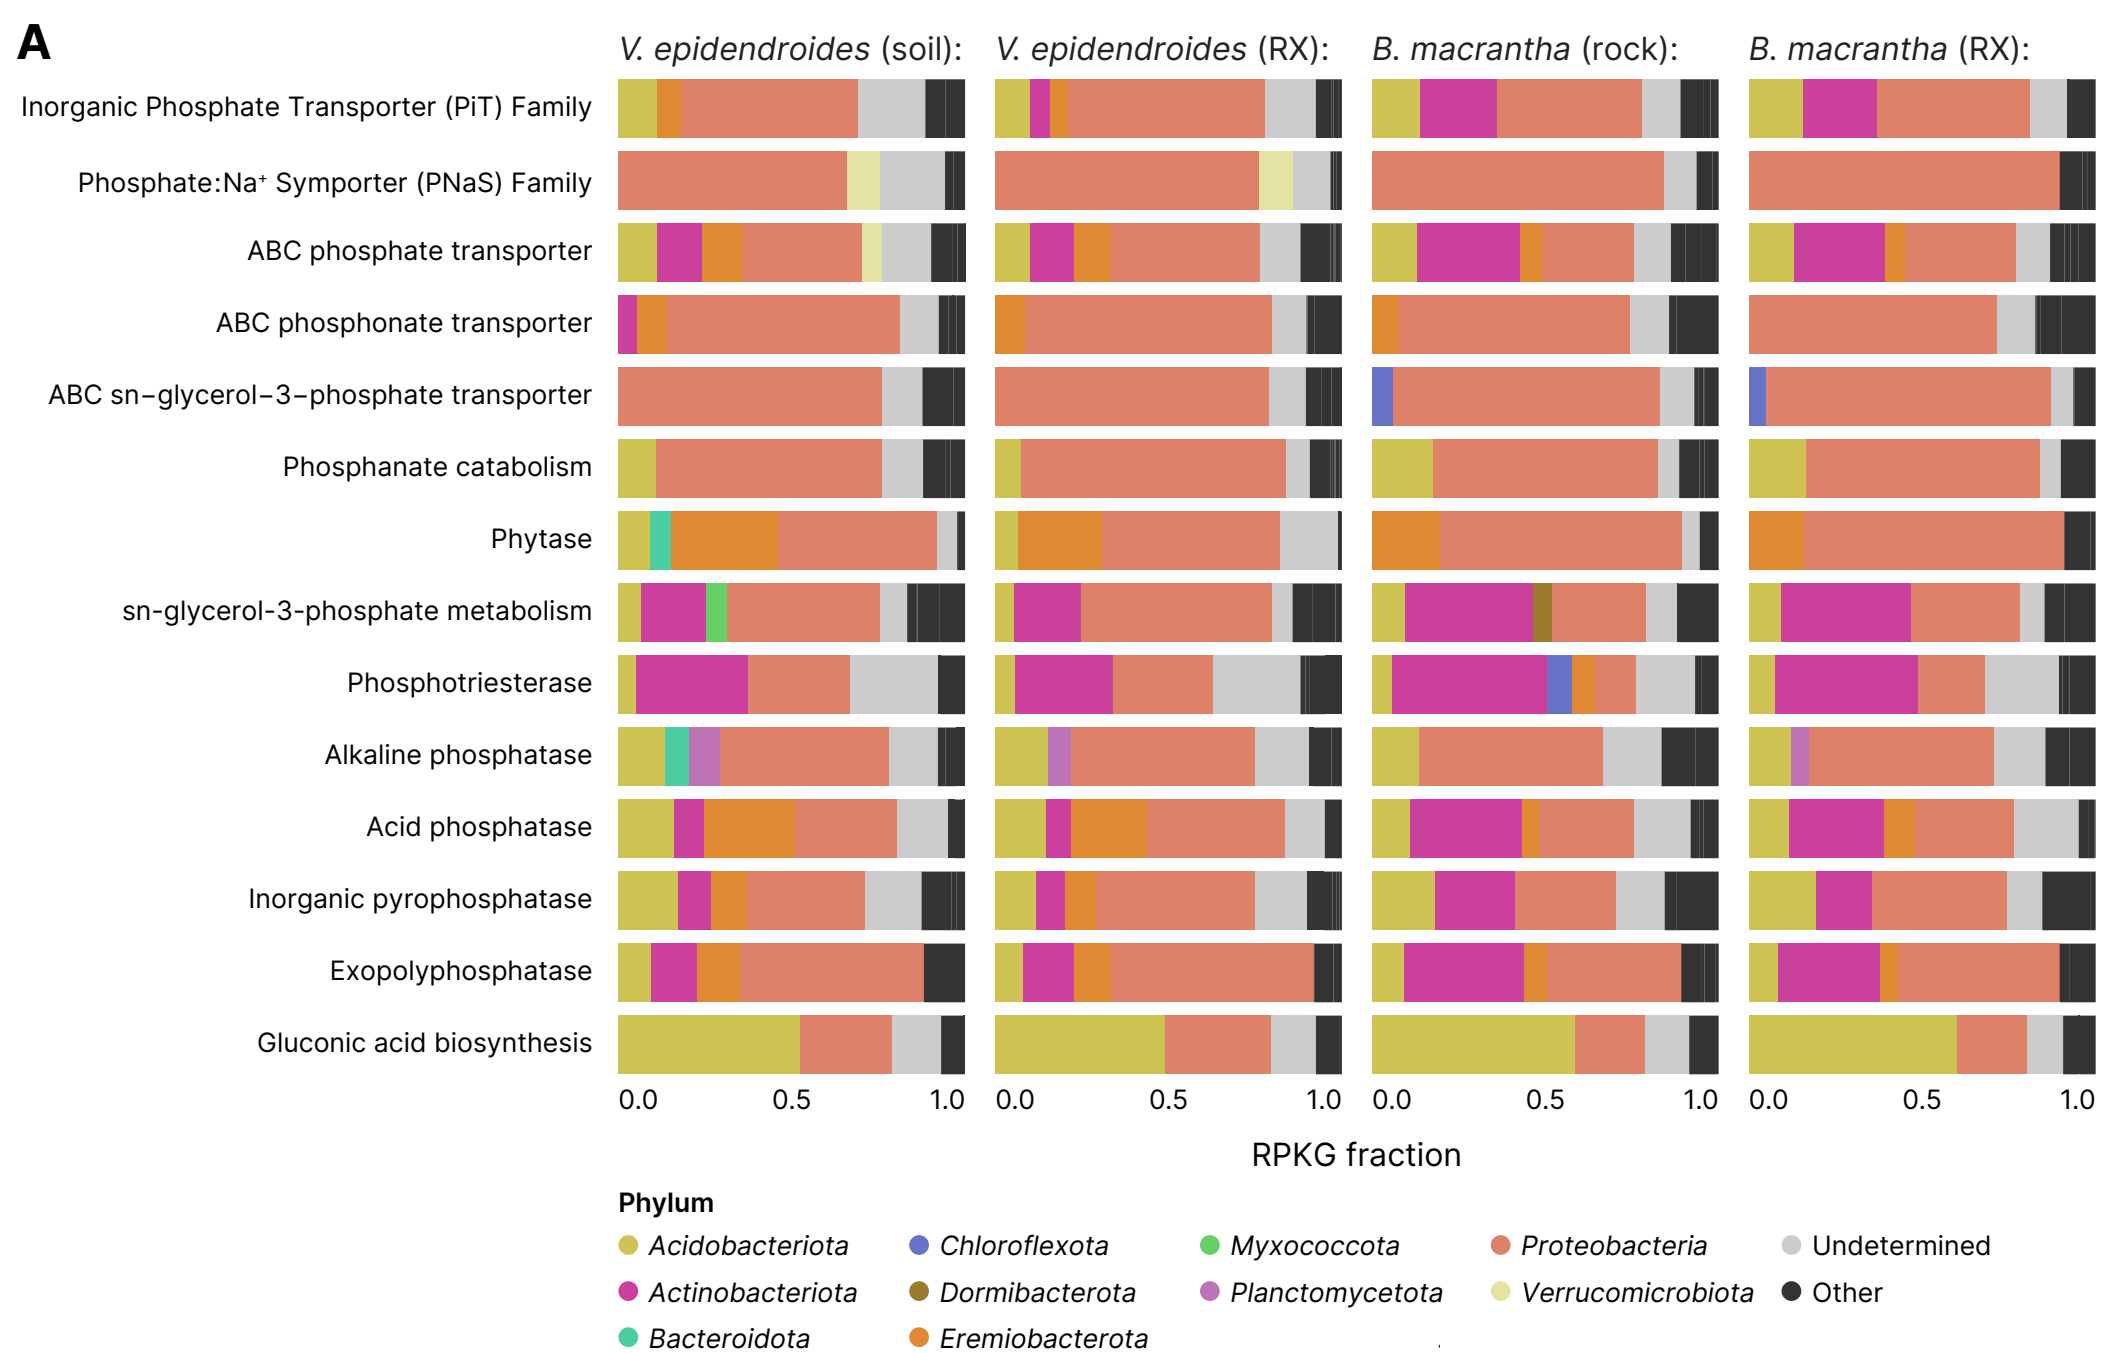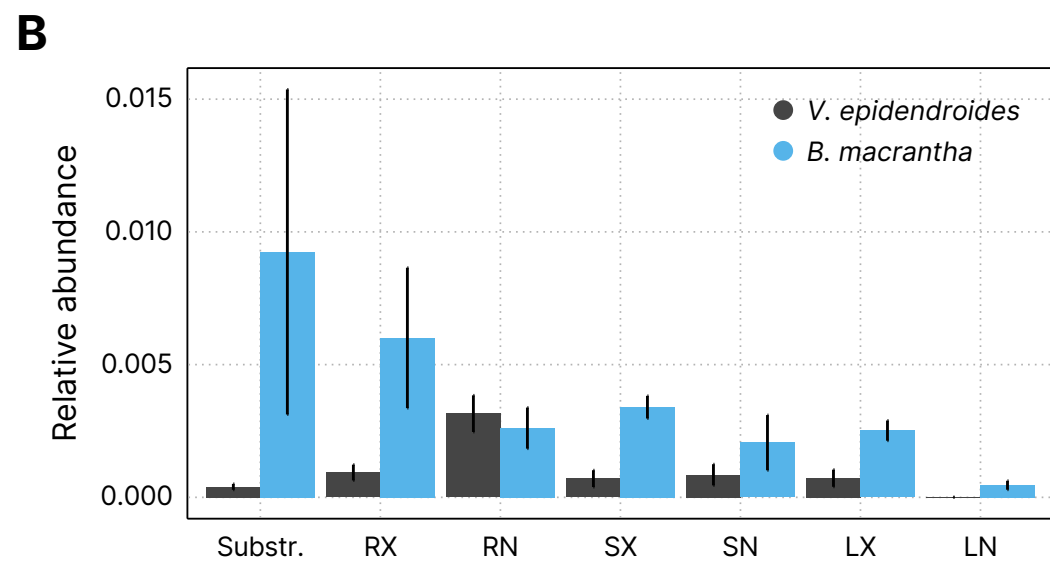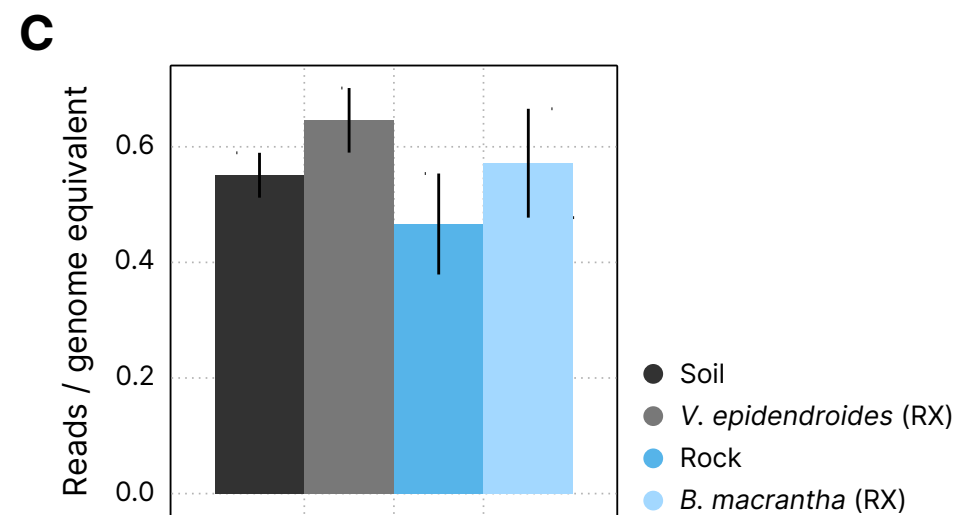

Supplement: 41396_2022_1345_MOESM7_ESM.pdf [file 41396_2022_1345_MOESM7_ESM.pdf]
